# Supplementary material for: Informatics analysis of capillary electropherograms of autologously doped and undoped blood
Source: Royal Society of Chemistry journal article supplement (doi:10.1039/c9ay00192a), 2019-01-01
Supplement: c9ay00192a1.pdf [file c9ay00192a1.pdf]

**Supporting Information for**  
**Informatics Analysis of Capillary Electropherograms of**  
**Autologously Doped and Undoped Blood**

**Shiladitya Chatterjee<sup>1</sup>, Sean C. Chapman<sup>1</sup>, George H. Major,<sup>1</sup> Denis L. Eggett<sup>1</sup>, Barry M. Lunt<sup>1</sup>, Christopher R. Harrison<sup>2</sup>, Matthew R. Linford<sup>1</sup>**

<sup>1</sup> Brigham Young University, Provo, Utah 84602, USA

<sup>2</sup>San Diego State University, San Diego, CA 92182-1030, USA

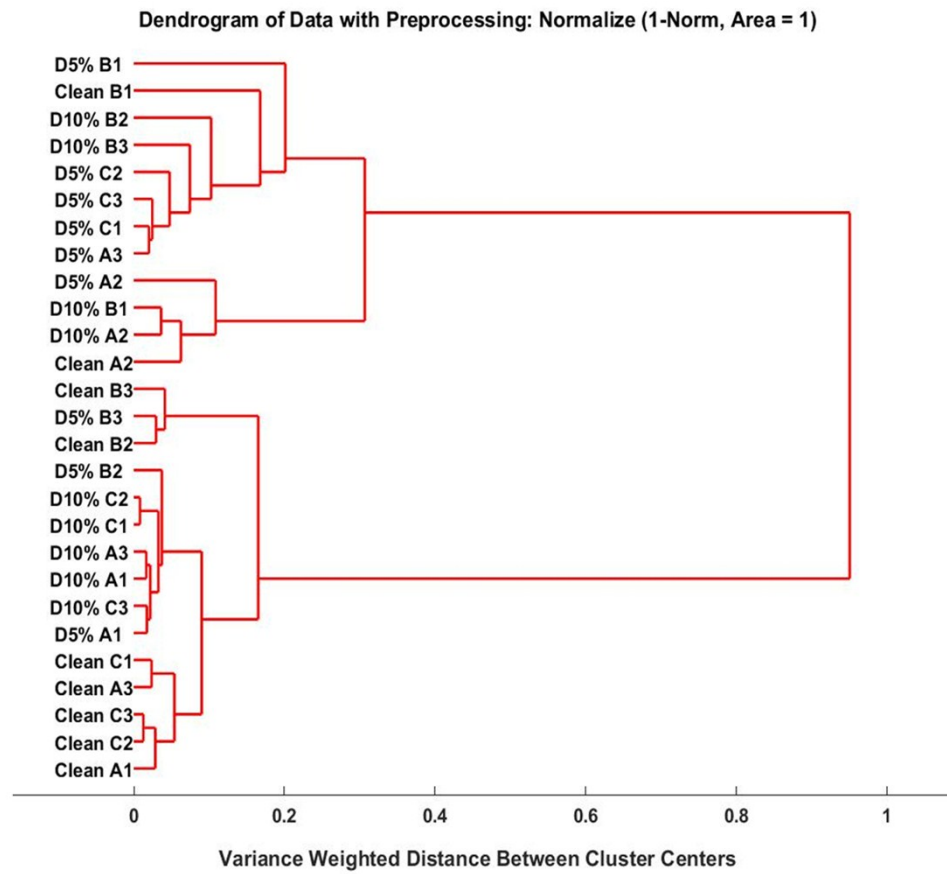

**Supporting Information Figure 1.** Dendrogram from a cluster analysis of the 0, 5, and 10 % electropherograms under consideration in this study. The data were pre-processed using range-selection followed by normalization (1-norm). ‘Clean’, ‘D5%’, and ‘D10%’ represent the 0, 5, and 10 % samples, and ‘A’, ‘B’, and ‘C’ represent the three subjects. The numbers after ‘A’, ‘B’, or ‘C’ represent replica runs.

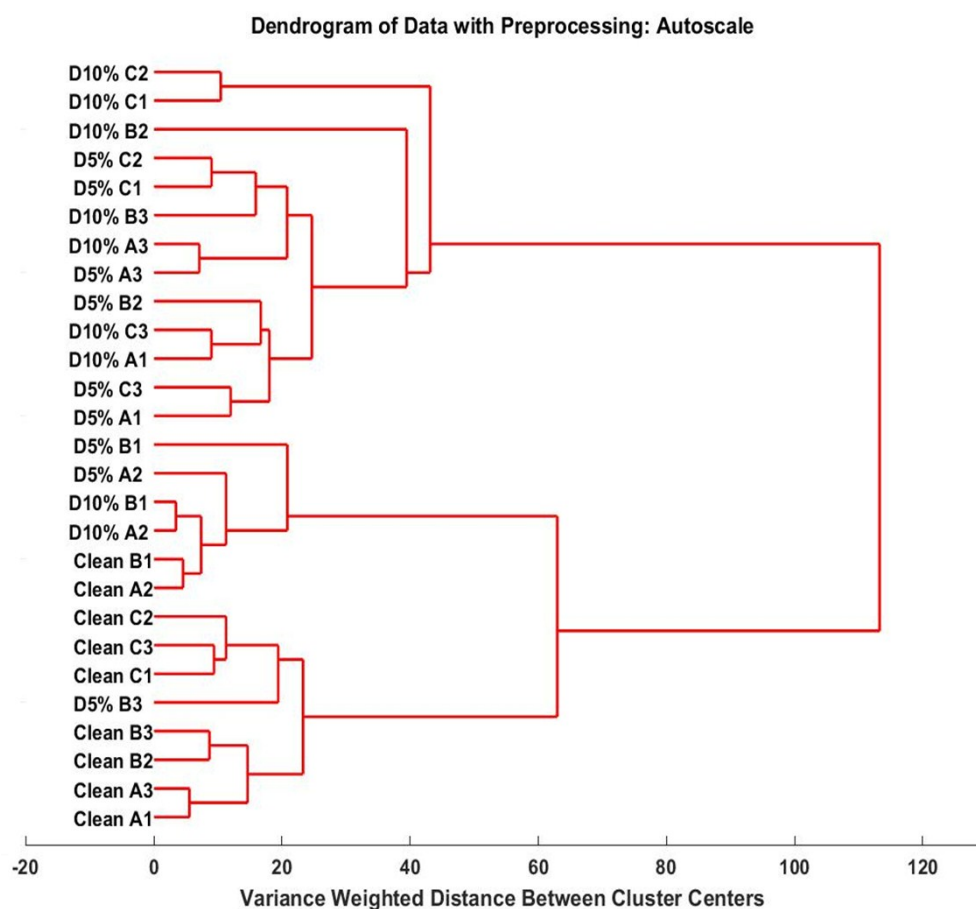

**Supporting Information Figure 2.** Dendrogram from a cluster analysis of the 0 %, 5 %, and 10 % electropherograms under consideration in this study. ‘Clean’, ‘D5%’, and ‘D10%’ represent the 0 %, 5 %, and 10% samples, and ‘A’, ‘B’, and ‘C’ represent the three subjects. The numbers after ‘A’, ‘B’, or ‘C’ represent replica runs. The data was pre-processed using range-selection followed by autoscaling.

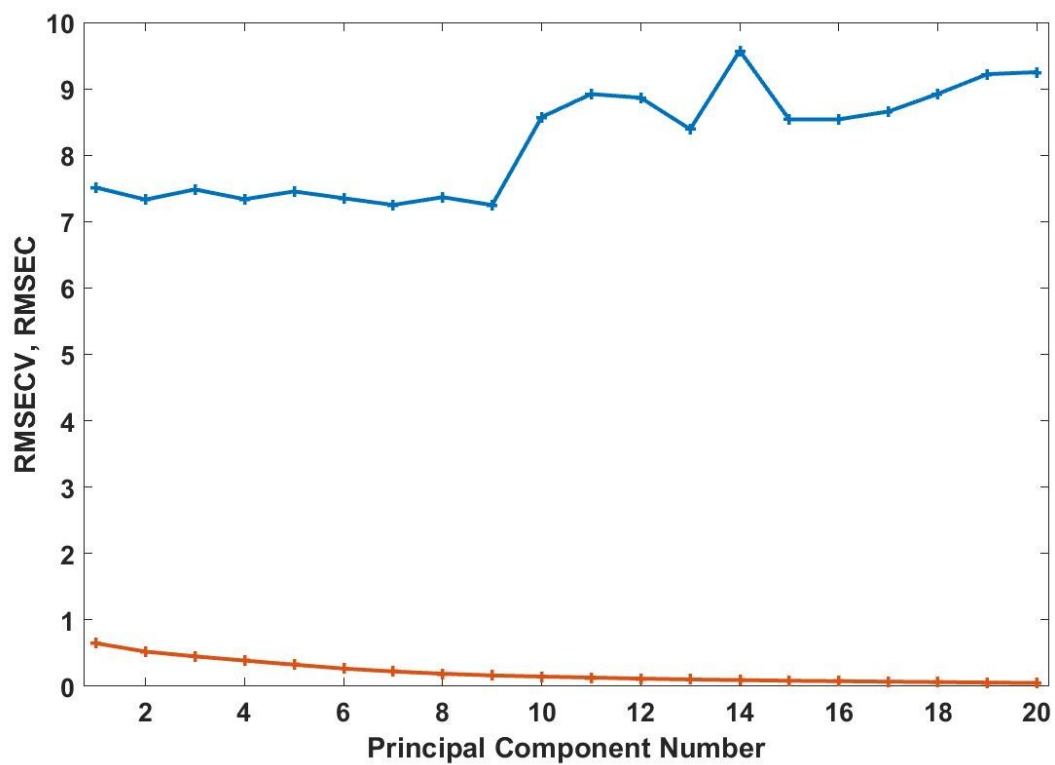

**Supporting Information Figure 3.** RMSEC (orange) and RMSECV (blue) plots from PCA calculations of the electropherograms from Subjects A, B and C for doped (5 % and 10 %) and undoped samples.

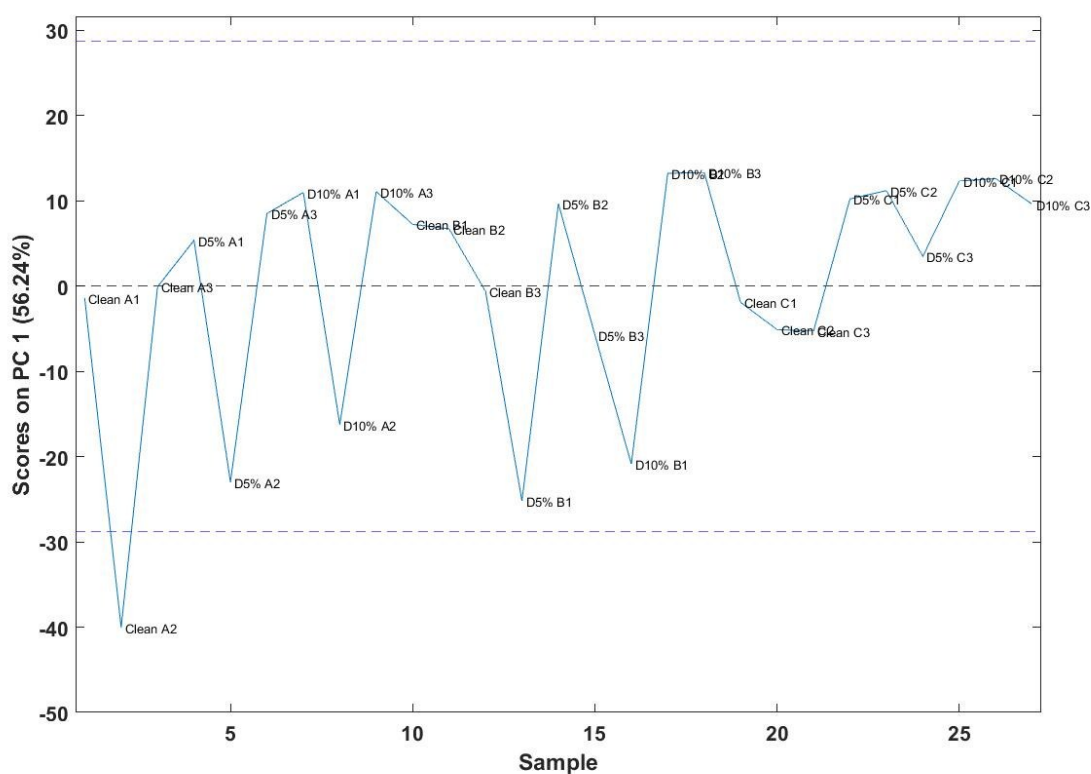

**Supporting Information Figure 4.** Scores on PC1 from replicate runs of Subjects A, B and C for doped (5 % and 10 %) and undoped samples for a 1-Component PCA Model. Note: The undoped samples are labeled as ‘Clean’ and the replicate runs are labeled with the subject name and run number, i.e., A2 represents the second replicate run of Subject A.

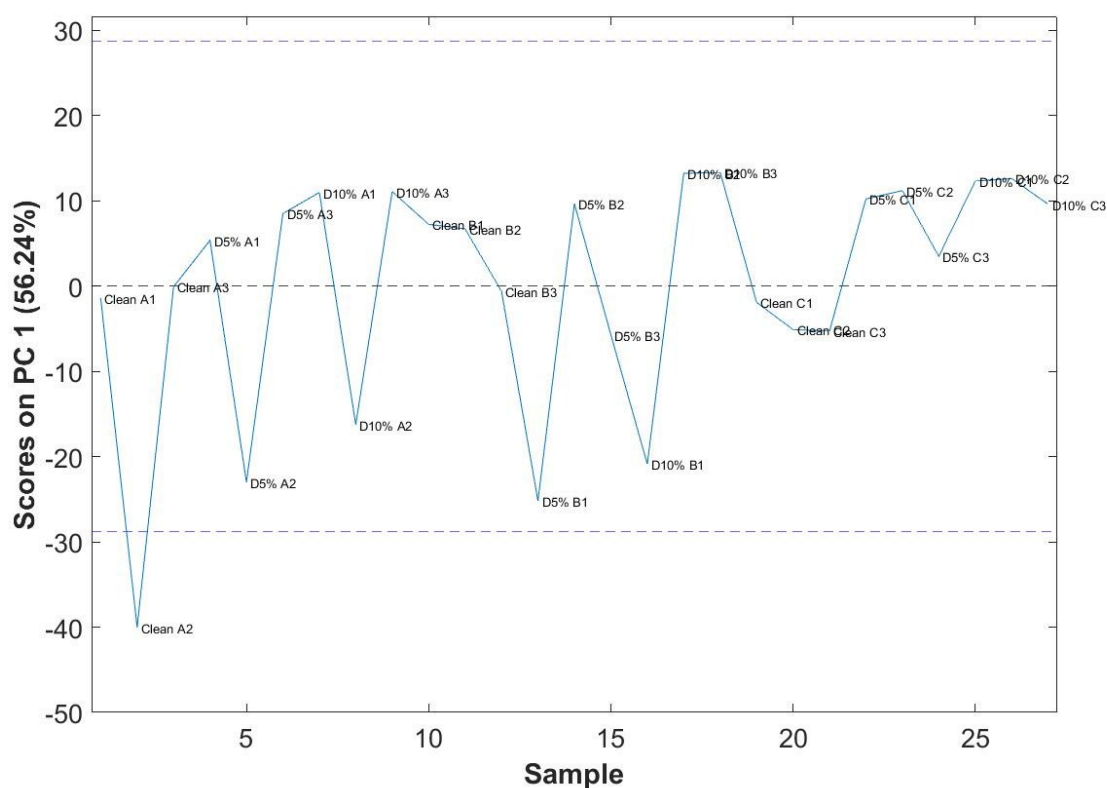

**Supporting Information Figure 5.** Scores on PC1 from replicate runs of Subjects A, B and C for doped (5 % and 10 %) and undoped samples for a 9-Component PCA Model. Note: The undoped samples are labeled as ‘Clean’ and the replicate runs are labeled with the subject name and run number, i.e., A2 represents the second replicate run of Subject A.

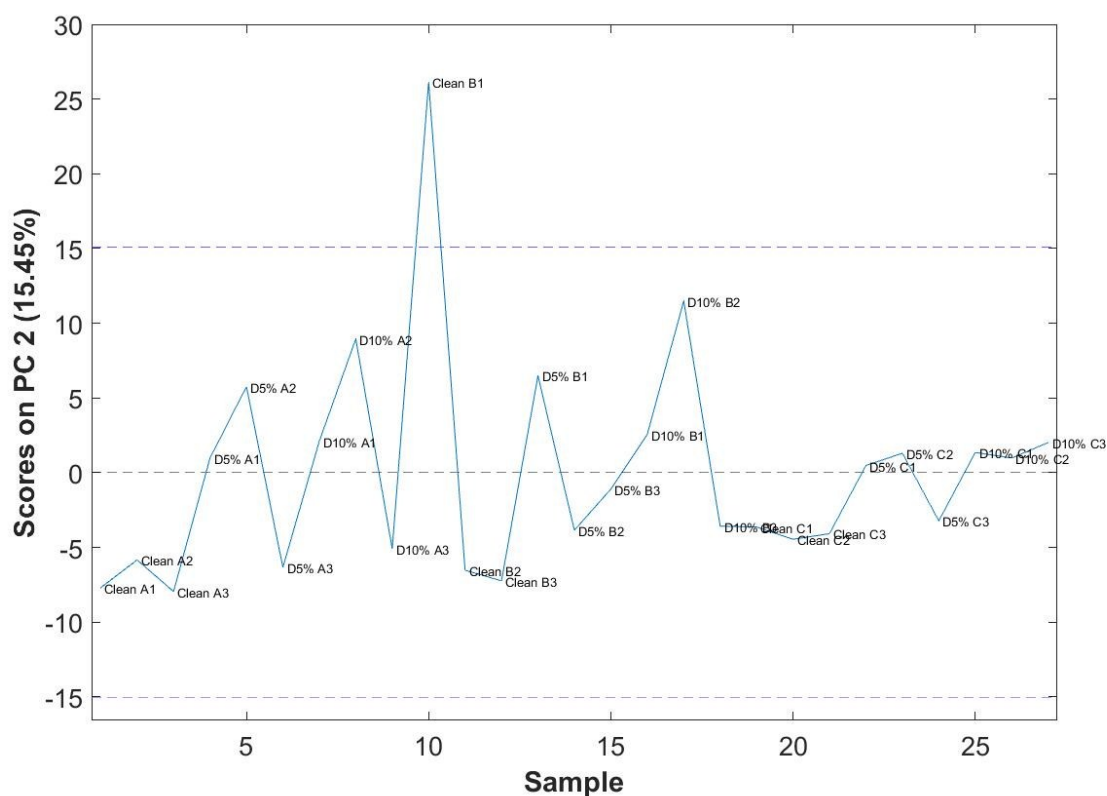

**Supporting Information Figure 6.** Scores on PC2 from replicate runs of Subjects A, B and C for doped (5 % and 10 %) and undoped samples for a 9-Component PCA Model. Note: The undoped samples are labeled as ‘Clean’ and the replicate runs are labeled with the subject name and run number, i.e., A2 represents the second replicate run of Subject A.

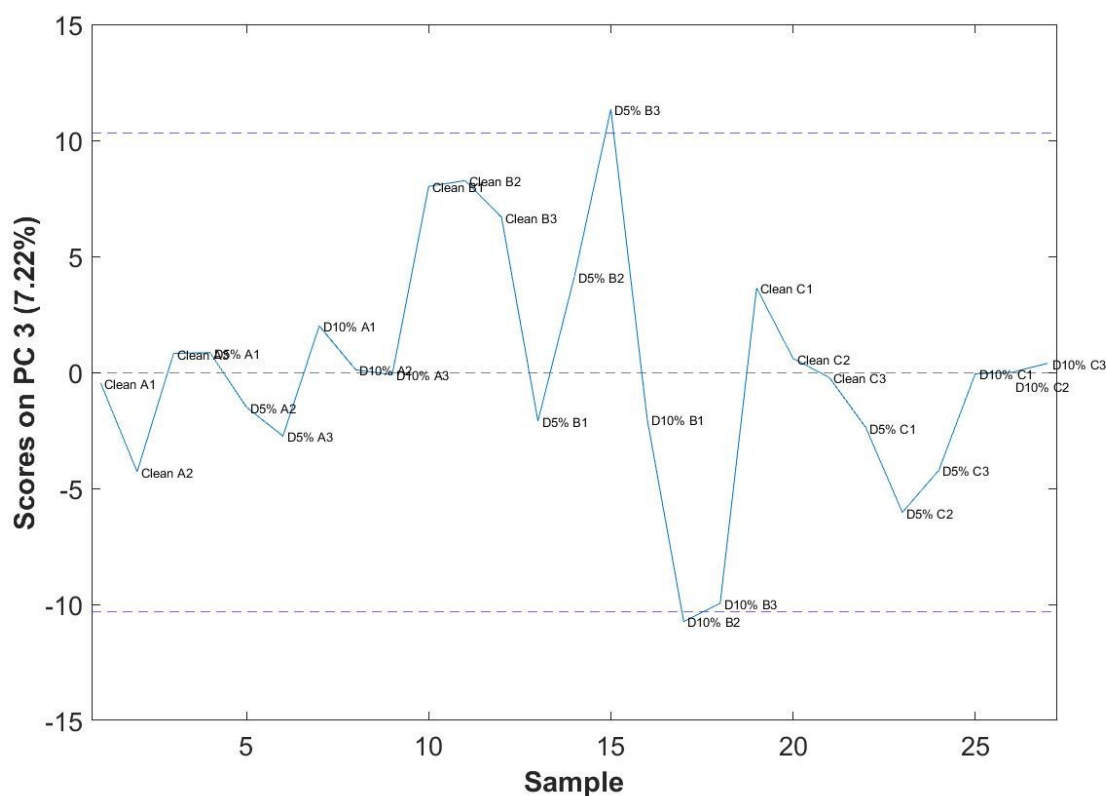

**Supporting Information Figure 7.** Scores on PC3 from replicate runs of Subjects A, B and C for doped (5 % and 10 %) and undoped samples for a 9-Component PCA Model. Note: The undoped samples are labeled as ‘Clean’ and the replicate runs are labeled with the subject name and run number, i.e., A2 represents the second replicate run of Subject A.

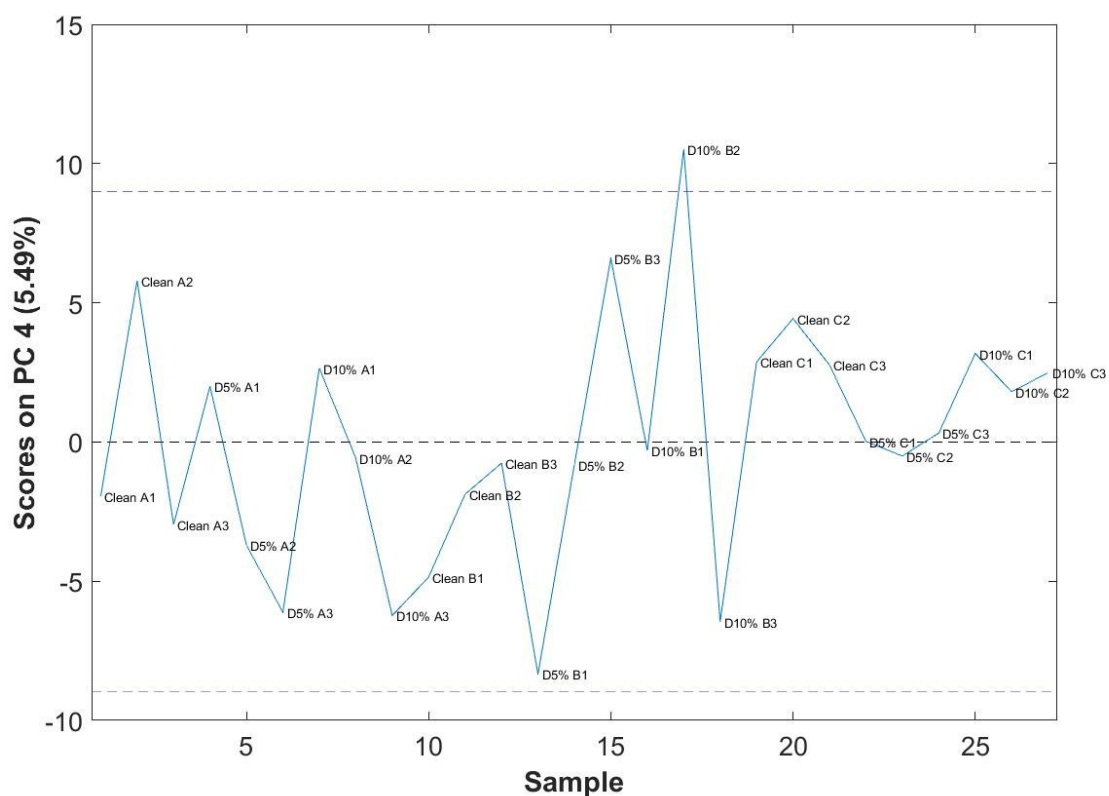

**Supporting Information Figure 8.** Scores on PC4 from replicate runs of Subjects A, B and C for doped (5 % and 10 %) and undoped samples for a 9-Component PCA Model. Note: The undoped samples are labeled as ‘Clean’ and the replicate runs are labeled with the subject name and run number, i.e., A2 represents the second replicate run of Subject A.

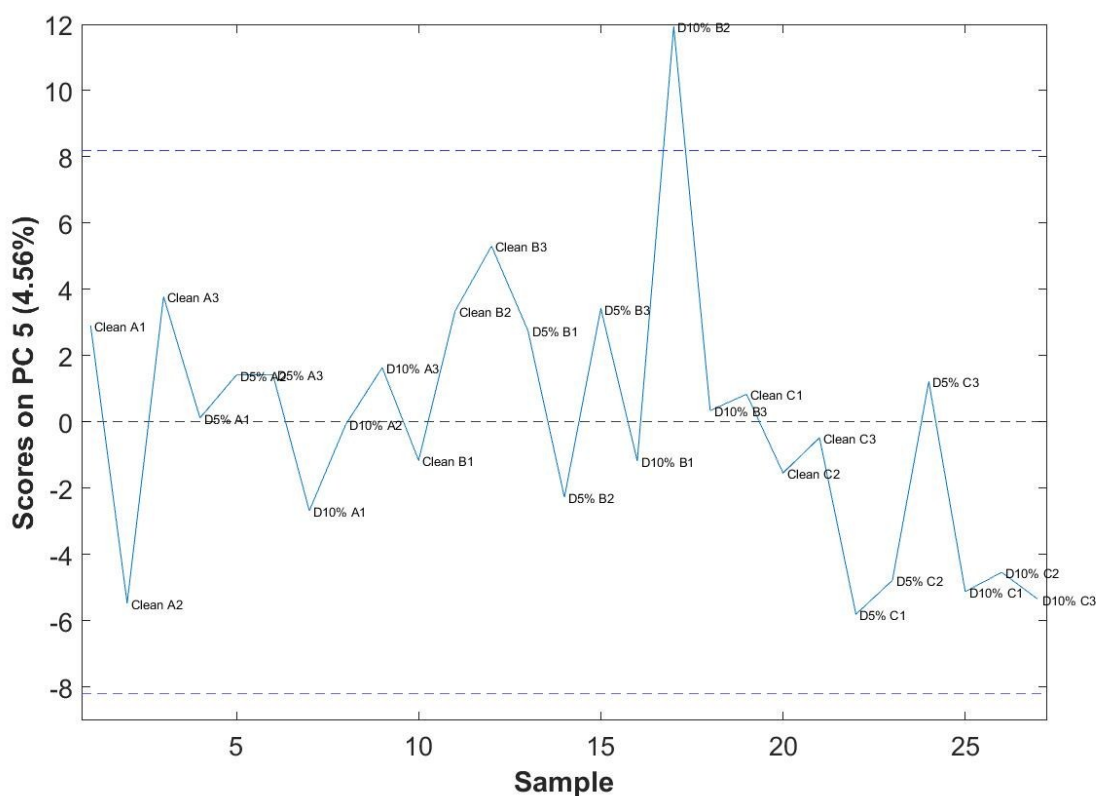

**Supporting Information Figure 9.** Scores on PC5 from replicate runs of Subjects A, B and C for doped (5 % and 10 %) and undoped samples for a 9-Component PCA Model. Note: The undoped samples are labeled as ‘Clean’ and the replicate runs are labeled with the subject name and run number, i.e., A2 represents the second replicate run of Subject A.

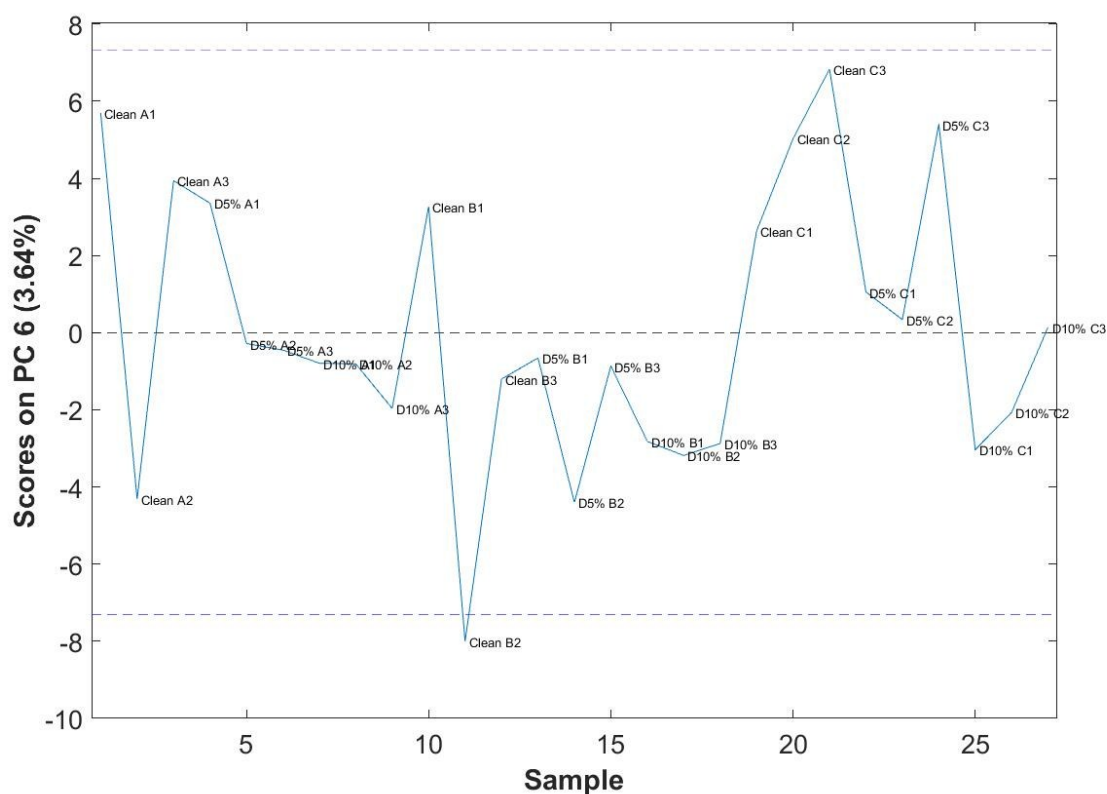

**Supporting Information Figure 10.** Scores on PC6 from replicate runs of Subjects A, B and C for doped (5 % and 10 %) and undoped samples for a 9-Component PCA Model. Note: The undoped samples are labeled as ‘Clean’ and the replicate runs are labeled with the subject name and run number, i.e., A2 represents the second replicate run of Subject A.

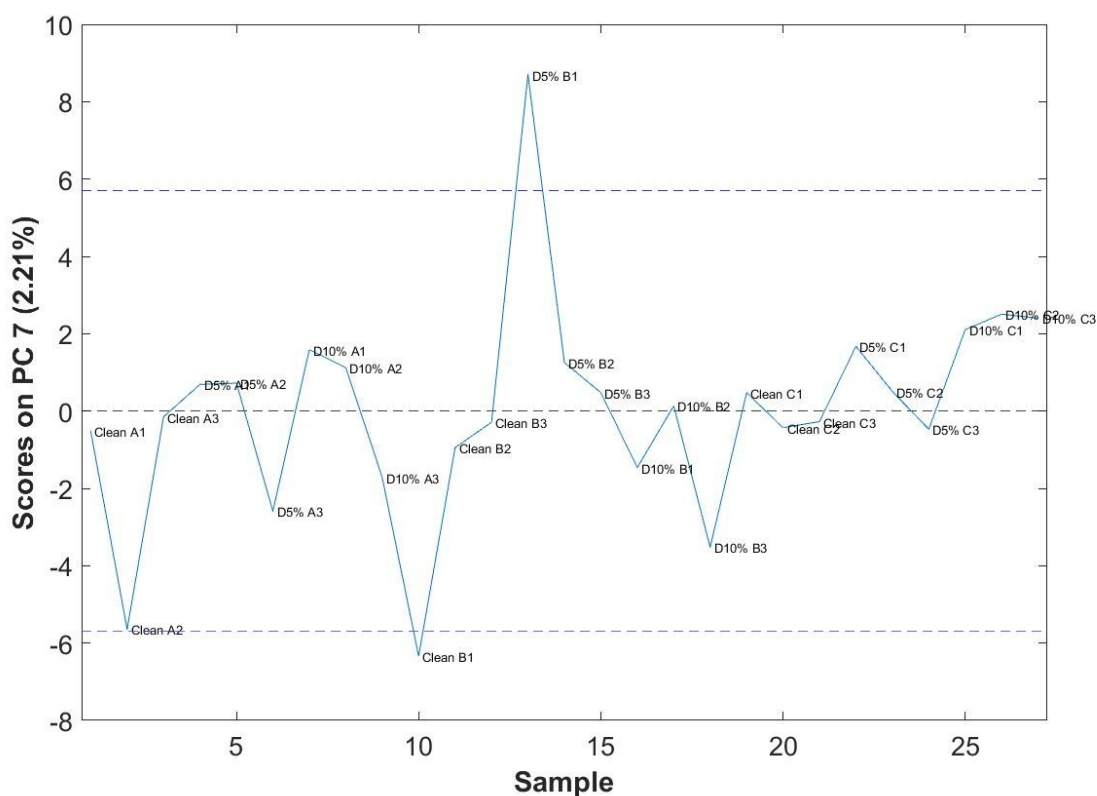

**Supporting Information Figure 11.** Scores on PC7 from replicate runs of Subjects A, B and C for doped (5 % and 10 %) and undoped samples for a 9-Component PCA Model. Note: The undoped samples are labeled as ‘Clean’ and the replicate runs are labeled with the subject name and run number, i.e., A2 represents the second replicate run of Subject A.

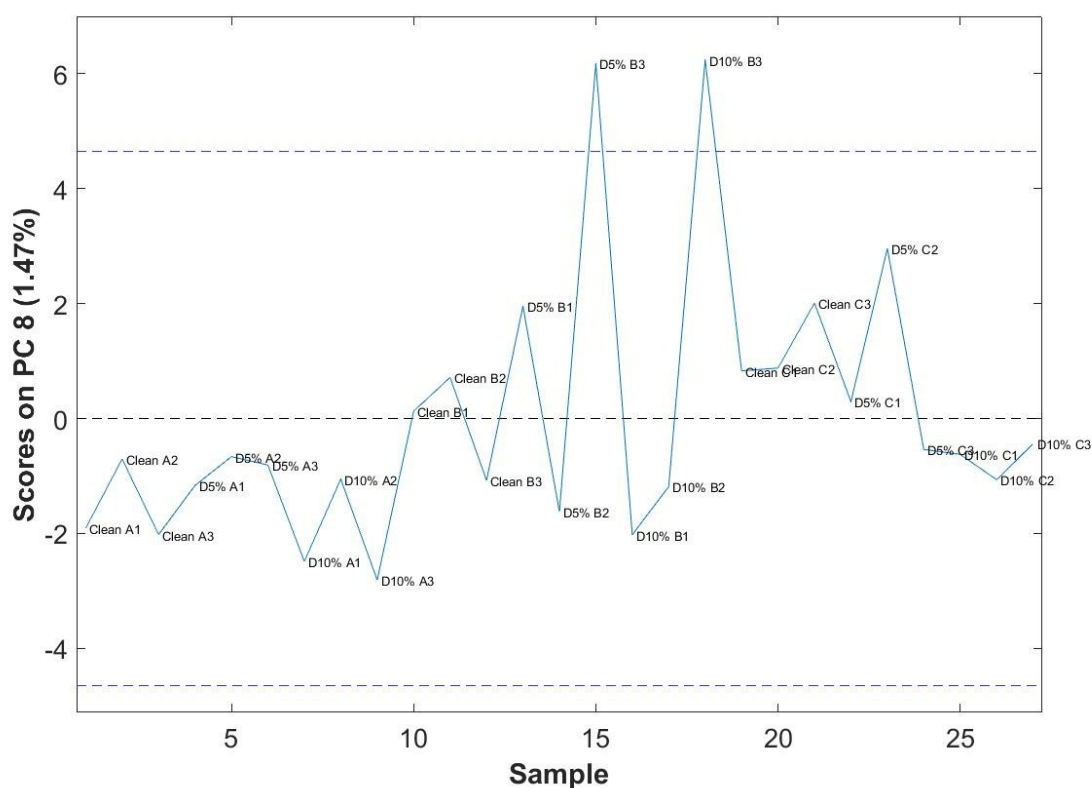

**Supporting Information Figure 12.** Scores on PC8 from replicate runs of Subjects A, B and C for doped (5 % and 10 %) and undoped samples for a 9-Component PCA Model. Note: The undoped samples are labeled as ‘Clean’ and the replicate runs are labeled with the subject name and run number, i.e., A2 represents the second replicate run of Subject A.

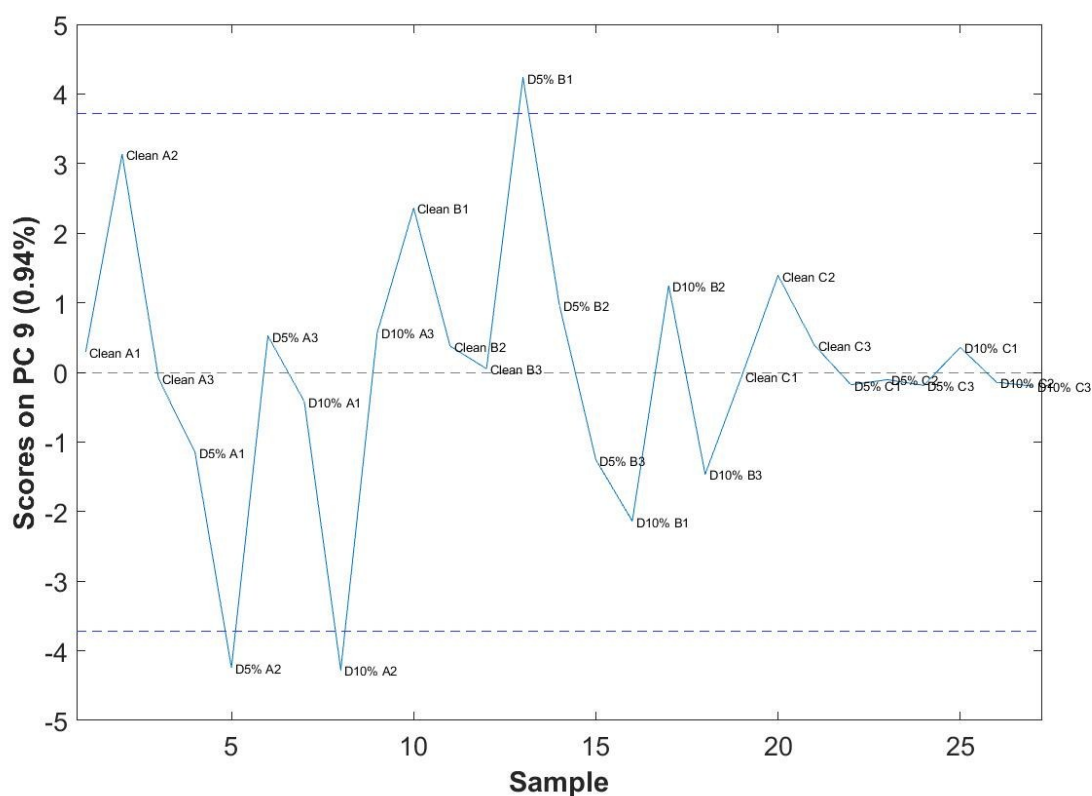

**Supporting Information Figure 13.** Scores on PC9 from replicate runs of Subjects A, B and C for doped (5 % and 10 %) and undoped samples for a 9-Component PCA Model. Note: The undoped samples are labeled as ‘Clean’ and the replicate runs are labeled with the subject name and run number, i.e., A2 represents the second replicate run of Subject A.

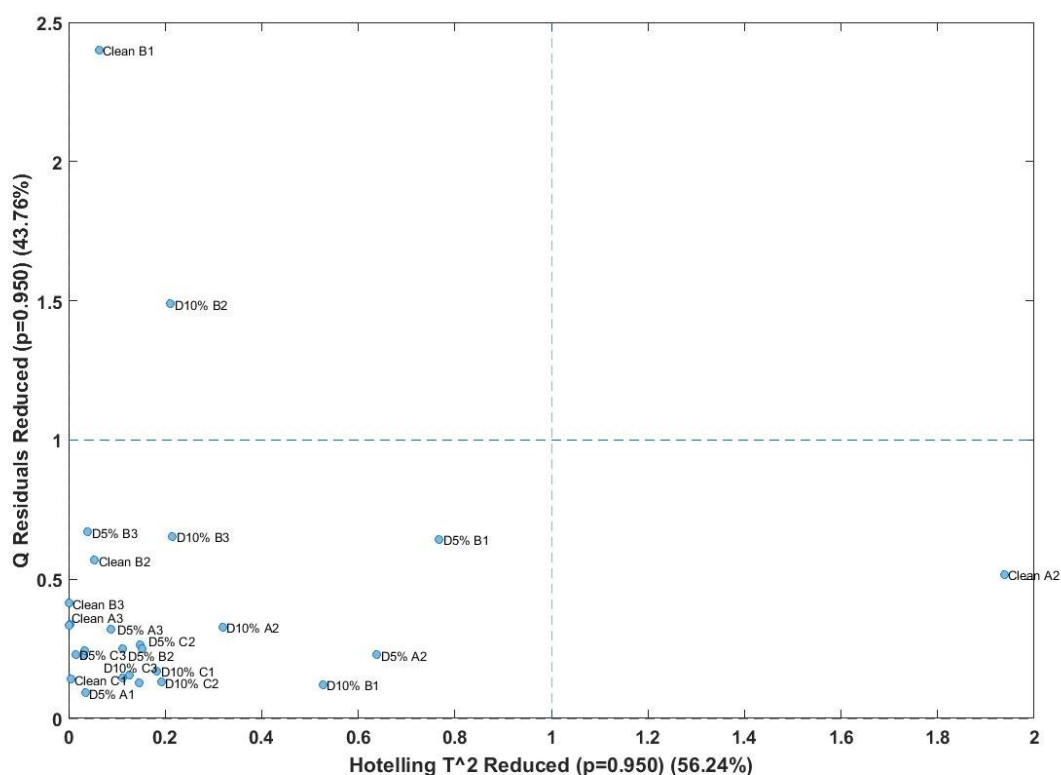

**Supporting Information Figure 14.** Hotelling T<sup>2</sup> vs Q residual plot from replicate runs of Subjects A, B and C for doped (5 % and 10 %) and undoped samples for a 1-Component PCA Model. Note: The undoped samples are labeled as ‘Clean’ and the replicate runs are labeled with the subject name and run number, i.e., A2 represents the second replicate run of Subject A.

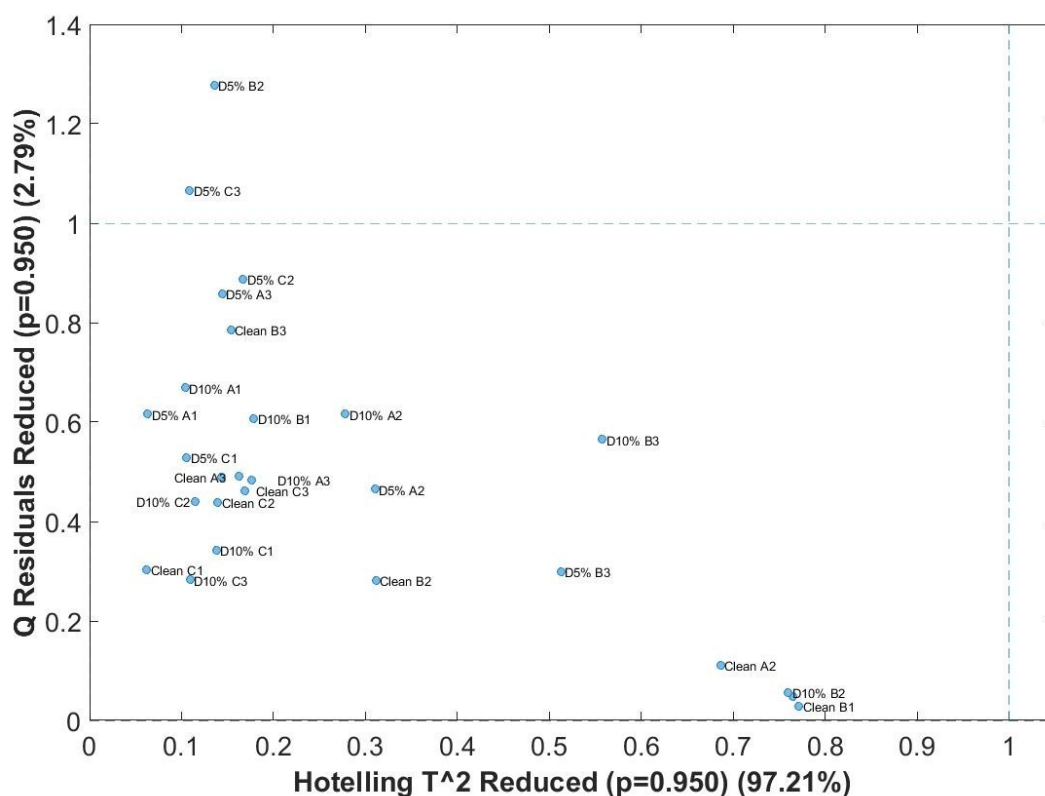

**Supporting Information Figure 15.** Hotelling  $T^2$  vs Q residual plot from replicate runs of Subjects A, B and C for doped (5 % and 10 %) and undoped samples for a 9-Component PCA Model. Note: The undoped samples are labeled as ‘Clean’ and the replicate runs are labeled with the subject name and run number, i.e., A2 represents the second replicate run of Subject A.

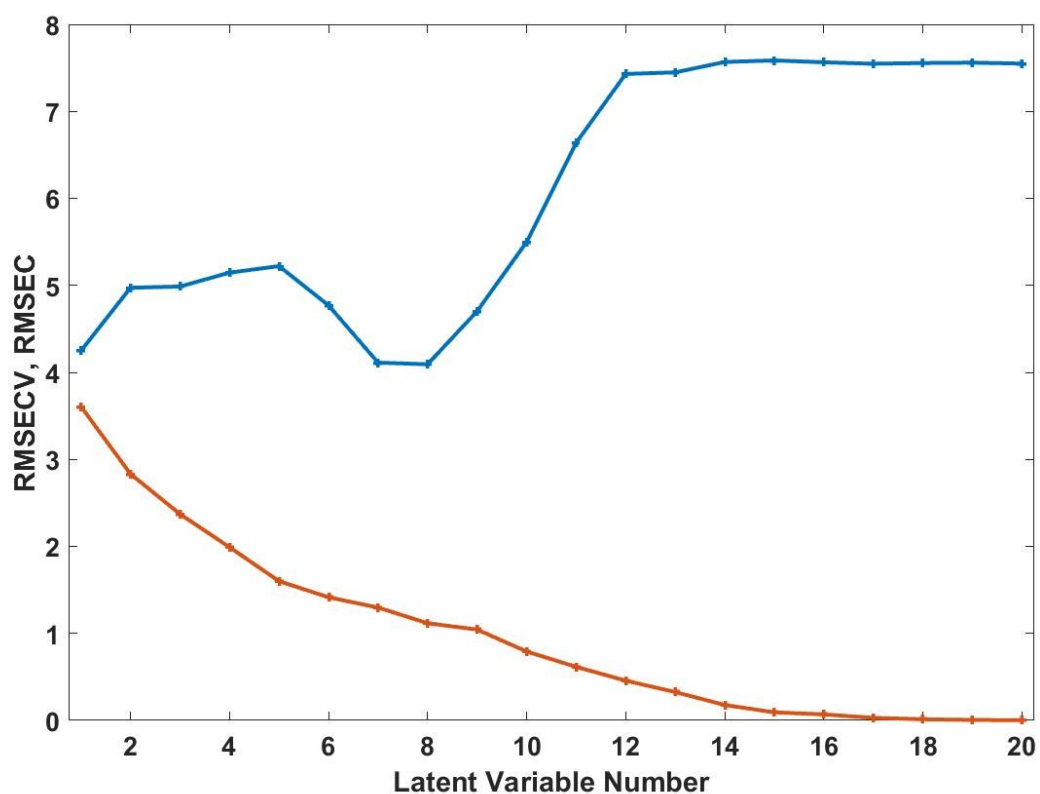

**Supporting Information Figure 16.** RMSEC (orange) and RMSECV (blue) plots from PLS calculations of the electropherograms from Subjects A, B and C for doped (5 % and 10 %) and undoped samples.

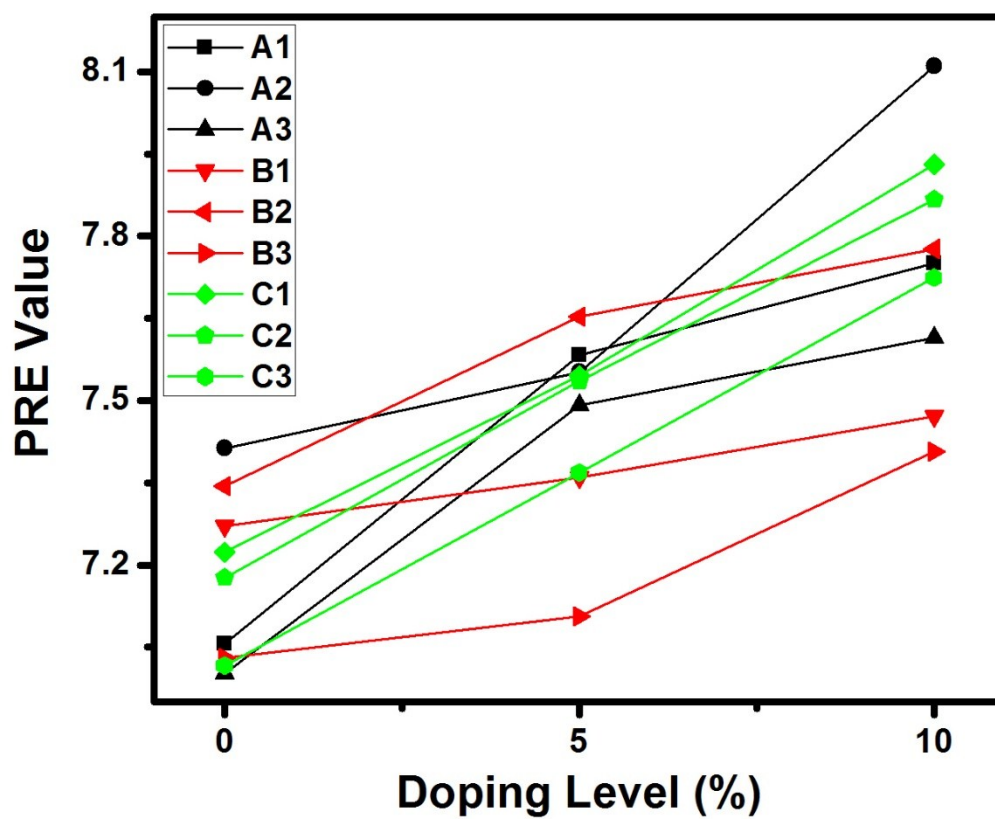

**Supporting Information Figure 17.** Raw PRE values of electrophoretic separations of subjects A, B and C for various doping levels (0 %, 5 % and 10 %).
